# Supplementary material
Source: PubMed Central journal article supplement (PMC7324195)
Supplement: jci-130-137181-s440.pdf [file jci-130-137181-s440.pdf]

**Supplemental Table 1**

| Combination in Clinical Trials            | Pre-clinical Data                                                                                                                                                                   | Current Clinical Trials in Children                                       | Current Clinical Trials in Adults                                                                                                                                                                                                                                                                                                                                                                                                                                                                 |
|-------------------------------------------|-------------------------------------------------------------------------------------------------------------------------------------------------------------------------------------|---------------------------------------------------------------------------|---------------------------------------------------------------------------------------------------------------------------------------------------------------------------------------------------------------------------------------------------------------------------------------------------------------------------------------------------------------------------------------------------------------------------------------------------------------------------------------------------|
| Anti-PD-1 and/or anti-CTLA-4 + anti-VEGF  | Anti-VEGF reverses T cell exhaustion and shows synergistic treatment effects when combined with anti-PD-L1 in pre-clinical testing (1)                                              | <ul style="list-style-type: none"> <li>▪ No trials in children</li> </ul> | <ul style="list-style-type: none"> <li>▪ Glioblastoma (NCT03452579)</li> <li>▪ HGG (NCT02829931)</li> <li>▪ NSCLC (NCT02574078)</li> <li>▪ Brain metastases (NCT02681549)</li> <li>▪ CRC (NCT03396926)</li> <li>▪ Ovarian cancer (NCT03596281)</li> <li>▪ Nasopharyngeal carcinoma (NCT03813394)</li> <li>▪ RCC (NCT02210117)</li> <li>▪ Melanoma (NCT01950390, NCT00790010)</li> </ul>                                                                                                           |
| Anti-PD-1 and/or anti-CTLA-4 + anti-RANKL | Anti-RANKL disrupts T cell negative selection in the thymus, allowing for the rescue of tumor-specific clones and the enhanced efficacy of anti-PD-1 in pre-clinical testing (2, 3) | <ul style="list-style-type: none"> <li>▪ No trials in children</li> </ul> | <ul style="list-style-type: none"> <li>▪ Melanoma (NCT03620019, NCT03161756)</li> <li>▪ NSCLC (NCT03669523, ACTRN12618001121257)</li> </ul>                                                                                                                                                                                                                                                                                                                                                       |
| Anti-PD-1 + anti-TGF                      | Anti-TGF- $\beta$ promotes T cell penetration into tumors, stimulates anti-tumor immunity and tumor regression when combined with anti-PD-1 in pre-clinical testing (25)            | <ul style="list-style-type: none"> <li>▪ No trials in children</li> </ul> | <ul style="list-style-type: none"> <li>▪ Advanced malignancies (NCT02947165)</li> </ul>                                                                                                                                                                                                                                                                                                                                                                                                           |
| Anti-PD-1 and/or anti-CTLA-4 + IDOi       | IDOi promotes T cell infiltration and proliferation in tumors and improves tumor control when combined with anti-PD-1 or anti-CTLA-4 in pre-clinical testing (4)                    | <ul style="list-style-type: none"> <li>▪ No trials in children</li> </ul> | <ul style="list-style-type: none"> <li>▪ Solid tumors (NCT03491631, NCT02959437, NCT03085914, NCT03459222, NCT03347123)</li> <li>▪ Gastrointestinal tumors (NCT03291054)</li> <li>▪ NSCLC (NCT03322540)</li> <li>▪ Melanoma (NCT04007588, NCT02073123)</li> <li>▪ Head and neck carcinomas (NCT03358472, NCT03854032)</li> <li>▪ Pancreatic cancer (NCT03006302)</li> <li>▪ Glioblastoma (NCT03707457, NCT04047706)</li> <li>▪ RCC (NCT03260894)</li> <li>▪ Liver cancer (NCT03695250)</li> </ul> |

|                                                                       |                                                                                                                                                                                                             |                                                                                   |                                                                                                                                                                                                                                                                                                                                                                                               |
|-----------------------------------------------------------------------|-------------------------------------------------------------------------------------------------------------------------------------------------------------------------------------------------------------|-----------------------------------------------------------------------------------|-----------------------------------------------------------------------------------------------------------------------------------------------------------------------------------------------------------------------------------------------------------------------------------------------------------------------------------------------------------------------------------------------|
| Anti-PD-1 and/or anti-CTLA-4 + HDACi (entinostat)                     | Entinostat neutralises MDSCs and enhances T cell anti-tumor responses when combined with anti-PD-1 in pre-clinical testing (5, 6)                                                                           | <ul style="list-style-type: none"> <li>High-risk cancers (NCT03838042)</li> </ul> | <ul style="list-style-type: none"> <li>Solid tumors (NCT02453620, NCT02909452)</li> <li>NSCLC (NCT01928576)</li> <li>Cholangiocarcinoma and pancreatic adenocarcinoma (NCT03250273)</li> <li>RCC (NCT03552380)</li> <li>Bladder cancer (NCT03978624)</li> <li>Melanoma (NCT03765229, NCT02697630)</li> <li>Breast Cancer (NCT02453620)</li> <li>NSCLC, CRC, Melanoma (NCT02437136)</li> </ul> |
| Anti-PD-1 and/or anti-CTLA-4 + HDACi (panobinostat)                   | Panobinostat upregulates PD-L1 expression by tumor cells, and controls tumor progression and improves survival when combined with anti-PD-1 in pre-clinical testing (7)                                     | <ul style="list-style-type: none"> <li>No trials in children</li> </ul>           | <ul style="list-style-type: none"> <li>Melanoma and NSCLC (NCT03982134)</li> <li>CRC, NSCLC, TBBC, RCC (NCT02890069)</li> <li>Melanoma (NCT02032810)</li> </ul>                                                                                                                                                                                                                               |
| Anti-PD-1 and/or anti-CTLA-4 + HDACi (vorinostat)                     | Vorinostat upregulates PD-L1 and MHC expression by tumor cells, increases T cell infiltration and controls tumor progression and improves survival when combined with anti-PD-1 in pre-clinical testing (8) | <ul style="list-style-type: none"> <li>No trials in children</li> </ul>           | <ul style="list-style-type: none"> <li>RCC and urothelial cell carcinoma (NCT02619253)</li> <li>Glioblastoma (NCT03426891)</li> <li>NSCLC (NCT02638090)</li> </ul>                                                                                                                                                                                                                            |
| Anti-PD-1 and/or anti-CTLA-4 + BRAFi (dabrafenib) + MEKi (trametinib) | BRAFi + MEKi enhances T cell infiltration into tumors, increases tumor antigen expression and is very effective when combined with anti-PD-1 in pre-clinical testing (9)                                    | <ul style="list-style-type: none"> <li>No trials in children</li> </ul>           | <ul style="list-style-type: none"> <li>Melanoma (NCT02130466, NCT01940809, NCT02967692, NCT02858921)</li> <li>CRC (NCT03668431)</li> </ul>                                                                                                                                                                                                                                                    |
| Anti-PD-1 + RTKi (sunitinib)                                          | Sunitinib reduces MDSC, increases CD8+ T cell infiltration, and in combination with anti-PD-1, induces complete tumor regression in pre-clinical testing (10)                                               | <ul style="list-style-type: none"> <li>No trials in children</li> </ul>           | <ul style="list-style-type: none"> <li>Sarcomas (NCT03277924)</li> <li>RCC (NCT03729245, NCT02960906, NCT03075423)</li> <li>GIST (NCT03609424)</li> </ul>                                                                                                                                                                                                                                     |
| Anti-PD-1 and/or anti-CTLA-4 + RTKi (cabozantinib)                    | No preclinical testing of cabozantinib with immune checkpoint inhibitors reported                                                                                                                           | <ul style="list-style-type: none"> <li>No trials in children</li> </ul>           | <ul style="list-style-type: none"> <li>RCC (NCT03729245, NCT03793166, NCT03937219, NCT03635892, NCT03141177)</li> <li>TNBC (NCT03316586)</li> <li>Endometrial Cancer (NCT03367741)</li> <li>Genitourinary Tumors (NCT03866382, NCT02496208)</li> <li>Thyroid cancer (NCT03914300)</li> <li>HCC (NCT01658878, NCT03299946)</li> </ul>                                                          |

|                                                  |                                                                                                                                                                                      |                                                                                                                                        |                                                                                                                                                                                                                                                                                                                                                                                                                                                                                                                                                                                                  |
|--------------------------------------------------|--------------------------------------------------------------------------------------------------------------------------------------------------------------------------------------|----------------------------------------------------------------------------------------------------------------------------------------|--------------------------------------------------------------------------------------------------------------------------------------------------------------------------------------------------------------------------------------------------------------------------------------------------------------------------------------------------------------------------------------------------------------------------------------------------------------------------------------------------------------------------------------------------------------------------------------------------|
| Anti-PD-1 and/or anti-CTLA-4 + RTKi (axitinib)   | Axitinib reduces MDSCs and significantly improves survival when combined with anti-PD-1 in pre-clinical testing (11)                                                                 | <ul style="list-style-type: none"> <li>RCC (NCT03595124), soft tissue sarcomas (NCT02636725)</li> </ul>                                | <ul style="list-style-type: none"> <li>RCC (NCT03595124, NCT02853331, NCT03172754)</li> </ul>                                                                                                                                                                                                                                                                                                                                                                                                                                                                                                    |
| Anti-PD-1 + RTKi (regorafenib)                   | Regorafenib limits tumor growth, decreases MDSC numbers and increases IFN- $\gamma$ production when combined with anti-PD-1 in pre-clinical testing (12)                             | <ul style="list-style-type: none"> <li>No trials in children</li> </ul>                                                                | <ul style="list-style-type: none"> <li>CRC (NCT03657641)</li> <li>HCC (NCT03347292)</li> </ul>                                                                                                                                                                                                                                                                                                                                                                                                                                                                                                   |
| Anti-PD-1 + RTKi (nintedanib)                    | Nintedanib significantly improves anti-tumor responses when combined with anti-PD-1 in pre-clinical testing (13)                                                                     | <ul style="list-style-type: none"> <li>No trials in children</li> </ul>                                                                | <ul style="list-style-type: none"> <li>NSCLC (NCT03377023)</li> </ul>                                                                                                                                                                                                                                                                                                                                                                                                                                                                                                                            |
| Anti-PD-1 and/or anti-CTLA-4 + RTKi (lenvatinib) | Lenvatinib decreases MDSC and increases T cell infiltration in tumors, and significantly improves anti-tumor responses when combined with anti-PD-1 in pre-clinical testing (14, 15) | <ul style="list-style-type: none"> <li>No trials in children</li> </ul>                                                                | <ul style="list-style-type: none"> <li>Solid tumors (NCT03797326)</li> <li>Gastroesophageal Cancer (NCT03321630)</li> <li>NSCLC (NCT03976375, NCT03829332, NCT03829319, NCT03516981)</li> <li>Liver cancers (NCT03895970, NCT03779100, NCT03951597, NCT04042805, NCT03713593)</li> <li>Endometrial cancers (NCT03517449)</li> <li>Urothelial cancers (NCT03898180)</li> <li>Melanoma (NCT03820986)</li> </ul>                                                                                                                                                                                    |
| Anti-PD-1 + RTKi (apatinib)                      | Apatinib decreases MDSC and increases T cell infiltration in tumors, and significantly improves survival when combined with anti-PD-L1 in pre-clinical testing (16)                  | <ul style="list-style-type: none"> <li>Soft tissue sarcoma (NCT03711279), sarcoma (NCT04126993), osteosarcoma (NCT03359018)</li> </ul> | <ul style="list-style-type: none"> <li>Solid tumors (NCT03491631)</li> <li>Gastric Cancer (NCT03954756, NCT03878472, NCT04006821)</li> <li>CRC (NCT03912857)</li> <li>TNBC (NCT03945604, NCT03394287)</li> <li>SCLC (NCT03417895)</li> <li>Oesophageal cancer (NCT03736863, NCT03603756)</li> <li>NSCLC (NCT03777124)</li> <li>Cervical cancer (NCT03816553)</li> <li>Liver cancer (NCT03092895)</li> <li>HCC (NCT03839550, NCT03793725, NCT04014101, NCT03722875)</li> <li>Ovarian cancer (NCT04068974)</li> <li>Sarcomas (NCT03711279, NCT03359018)</li> <li>Melanoma (NCT03955354)</li> </ul> |
| Anti-PD-1 + RTKi (anlotinib)                     | No preclinical testing of Anlotinib with immune checkpoint inhibitors reported                                                                                                       | <ul style="list-style-type: none"> <li>Soft tissue sarcomas (NCT03946943)</li> </ul>                                                   | <ul style="list-style-type: none"> <li>SCLC (NCT04055792)</li> <li>NSCLC (NCT03765775)</li> <li>HCC (NCT04052152)</li> </ul>                                                                                                                                                                                                                                                                                                                                                                                                                                                                     |

|                                 |                                                                                                         |                                                                           |                                                                                |
|---------------------------------|---------------------------------------------------------------------------------------------------------|---------------------------------------------------------------------------|--------------------------------------------------------------------------------|
|                                 |                                                                                                         |                                                                           |                                                                                |
| Anti-PD-1 + RTKi (fruquintinib) | Fruquintinib improves anti-tumor response when combined with anti-PD-L1 in pre-clinical testing (17)    | <ul style="list-style-type: none"> <li>▪ No trials in children</li> </ul> | <ul style="list-style-type: none"> <li>▪ Solid tumors (NCT03903705)</li> </ul> |
| Anti-PD-1 + RTKi (imatinib)     | Imatinib improves anti-tumor T cell responses when combined with anti-PD-1 in pre-clinical testing (18) | <ul style="list-style-type: none"> <li>▪ No trials in children</li> </ul> | <ul style="list-style-type: none"> <li>▪ GIST (NCT03609424)</li> </ul>         |

**Supplemental Table 1: Immune checkpoint inhibitors in combination with other immunomodulatory drugs in clinical trials for adult and pediatric cancers.** BRAFi, BRAF inhibitor; CRC, colorectal cancer; GIST, Gastrointestinal stromal tumors; HCC, hepatocellular carcinoma; HDACi, histone deacetylase inhibitor; HGG, high-grade gliomas; IDO, indoleamine 2, 3 dioxygenase; MDSC, myeloid-derived suppressor cell; MEKi, mitogen-activated protein kinase inhibitor; NSCLC, non-small cell lung cancer; PD-1, programmed death-1; PD-L1, programmed death ligand-1; RANKL, receptor activator of nuclear factor kappa-B ligand; RCC, renal cell carcinoma; RTKi, receptor tyrosine kinase inhibitor; TNBC, triple-negative breast cancer; VEGF, vascular endothelial growth factor.

## Supplemental References

1. Meder L, Schuldt P, Thelen M, Schmitt A, Dietlein F, Klein S, et al. Combined VEGF and PD-L1 Blockade Displays Synergistic Treatment Effects in an Autochthonous Mouse Model of Small Cell Lung Cancer. *Cancer Research*. 2018;78(15):4270-81.
2. Ahern E, Harjunpaa H, O'Donnell JS, Allen S, Dougall WC, Teng MWL, et al. RANKL blockade improves efficacy of PD1-PD-L1 blockade or dual PD1-PD-L1 and CTLA4 blockade in mouse models of cancer. *Oncoimmunology*. 2018;7(6):e1431088.
3. Su MA, and Anderson MS. Pulling RANK on Cancer: Blocking Aire-Mediated Central Tolerance to Enhance Immunotherapy. *Cancer Immunol Res*. 2019;7(6):854-9.
4. Spranger S, Koblish HK, Horton B, Scherle PA, Newton R, and Gajewski TF. Mechanism of tumor rejection with doublets of CTLA-4, PD-1/PD-L1, or IDO blockade involves restored IL-2 production and proliferation of CD8(+) T cells directly within the tumor microenvironment. *J Immunother Cancer*. 2014;2:3.
5. Orillion A, Hashimoto A, Damayanti N, Shen L, Adelaiye-Ogala R, Arisa S, et al. Entinostat Neutralizes Myeloid-Derived Suppressor Cells and Enhances the Antitumor Effect of PD-1 Inhibition in Murine Models of Lung and Renal Cell Carcinoma. *Clin Cancer Res*. 2017;23(17):5187-201.
6. Christmas BJ, Rafie CI, Hopkins AC, Scott BA, Ma HS, Cruz KA, et al. Entinostat Converts Immune-Resistant Breast and Pancreatic Cancers into Checkpoint-Responsive Tumors by Reprogramming Tumor-Infiltrating MDSCs. *Cancer Immunology Research*. 2018;6(12):1561-77.
7. Woods DM, Sodr  AL, Villagra A, Sarnaik A, Sotomayor EM, and Weber J. HDAC Inhibition Upregulates PD-1 Ligands in Melanoma and Augments Immunotherapy with PD-1 Blockade. *Cancer Immunology Research*. 2015;3(12):1375-85.
8. Terranova-Barberio M, Thomas S, Ali N, Pawlowska N, Park J, Krings G, et al. HDAC inhibition potentiates immunotherapy in triple negative breast cancer. *Oncotarget*. 2017;8(69):114156-72.
9. Frederick DT, Piris A, Cogdill AP, Cooper ZA, Lezcano C, Ferrone CR, et al. BRAF inhibition is associated with enhanced melanoma antigen expression and a more favorable tumor microenvironment in patients with metastatic melanoma. *Clin Cancer Res*. 2013;19(5):1225-31.

10. Rayman P, Diaz-Montero CM, Yang Y, Rini B, Elson P, and Finke J. Modulation of immune cell infiltrate with sunitinib to improve anti-PD1 therapy in preclinical tumor model. *Journal for ImmunoTherapy of Cancer*. 2015;3(2):P310.
11. Läubli H, Müller P, D'Amico L, Buchi M, Kashyap AS, and Zippelius A. The multi-receptor inhibitor axitinib reverses tumor-induced immunosuppression and potentiates treatment with immune-modulatory antibodies in preclinical murine models. *Cancer Immunology, Immunotherapy*. 2018;67(5):815-24.
12. Hoff S, Grünewald S, Röse L, and Zopf D. 1198P Immunomodulation by regorafenib alone and in combination with anti PD1 antibody on murine models of colorectal cancer. *Annals of Oncology*. 2017;28(suppl\_5).
13. Hilberg F, Reschke M, Hofmann M, and Kraut N. P2.01-045 Nintedanib Improves Anti-Tumor Efficacy in Combination with Anti PD-1 in Syngeneic Tumor Models Sensitive and Refractory to IO Inhibition: Topic: Immune Mechanisms in Thoracic Cancer and Targeted Therapy. *Journal of Thoracic Oncology*. 2017;12(1):S813.
14. Kimura T, Kato Y, Ozawa Y, Kodama K, Ito J, Ichikawa K, et al. Immunomodulatory activity of lenvatinib contributes to antitumor activity in the Hepa1-6 hepatocellular carcinoma model. *Cancer Sci*. 2018;109(12):3993-4002.
15. Gunda V, Gigliotti B, Ashry T, Ndishabandi D, McCarthy M, Zhou Z, et al. Anti-PD-1/PD-L1 therapy augments lenvatinib's efficacy by favorably altering the immune microenvironment of murine anaplastic thyroid cancer. *International Journal of Cancer*. 2019;144(9):2266-78.
16. Zhao S, Ren S, Jiang T, Zhu B, Li X, Zhao C, et al. Low-Dose Apatinib Optimizes Tumor Microenvironment and Potentiates Antitumor Effect of PD-1/PD-L1 Blockade in Lung Cancer. *Cancer Immunology Research*. 2019;7(4):630-43.
17. Ren Y, Sun Q, Long J, Fan S, Tang R, Zhang W, et al. Abstract 2089: Evaluation of fruquintinib, a potent and selective oral VEGFR inhibitor, in combination with targeted therapies or immune checkpoint inhibitors in preclinical tumor models. *Cancer Research*. 2017;77(13 Supplement):2089-.

18. Seifert AM, Zeng S, Zhang JQ, Kim TS, Cohen NA, Beckman MJ, et al. PD-1/PD-L1 Blockade Enhances T-cell Activity and Antitumor Efficacy of Imatinib in Gastrointestinal Stromal Tumors. *Clinical Cancer Research*. 2017;23(2):454-65.
